# Supplementary material for: Extraction, Structural, and Antioxidant Properties of Oligosaccharides Hydrolyzed from Panax notoginseng by Ultrasonic-Assisted Fenton Degradation
Source: MDPI journal article supplement (doi:10.3390/ijms24054506), 2023-02-24
Supplement: s1 [file s1]

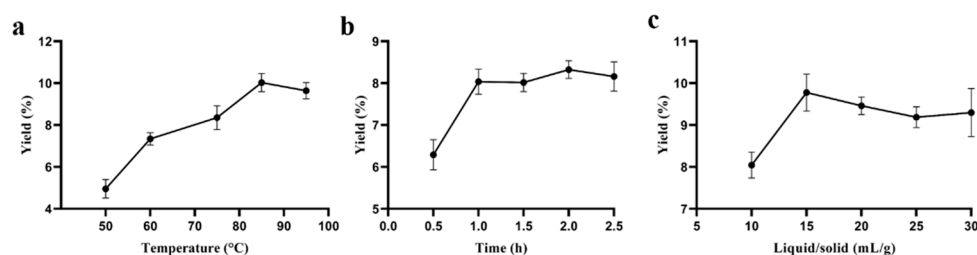

**Figure S1.** Effect of single factors on the yield of PP. Effect of (a) extraction temperature, (b) extraction time, and (c) liquid/solid ratio on the yield of PP.

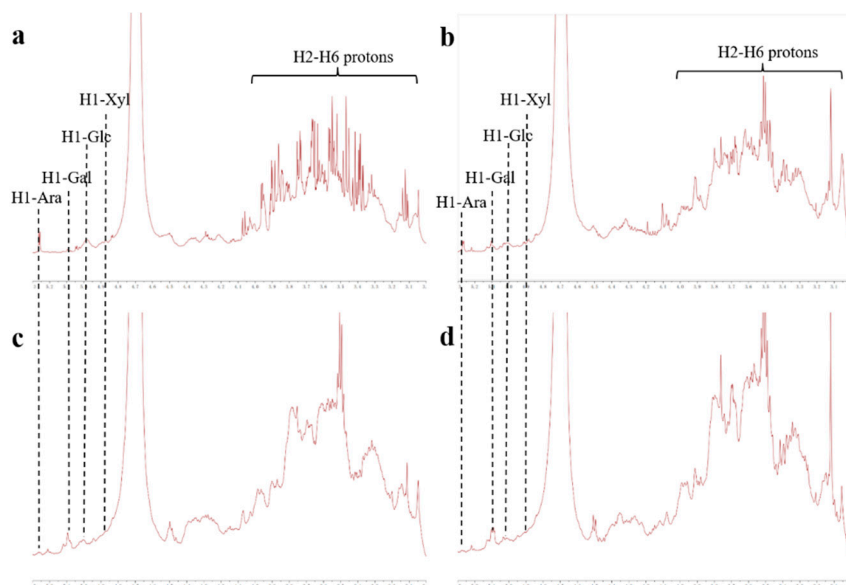

**Figure S2.** <sup>1</sup>H NMR spectra of PP (a), PP3 (b), PP5 (c), and PP7 (d).

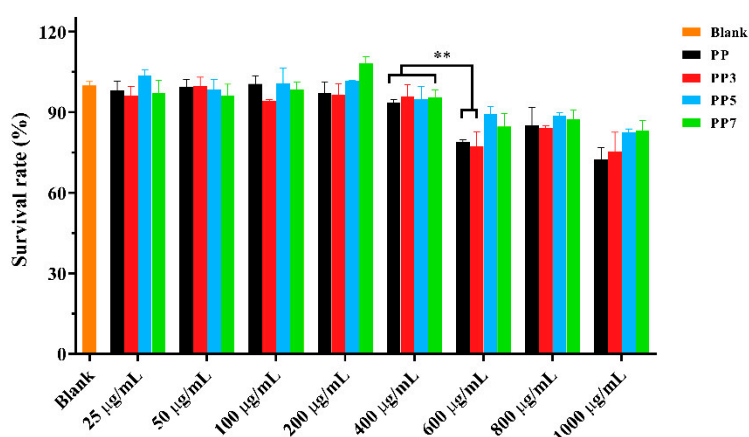

**Figure S3.** Cell viability of HHL-5 cells after the treatment of PPs with concentration from 25 to 1000 µg/mL. The value is presented as the mean ± SD (n = 3). \*\*: Statistically significant differences between compared samples ( $p < 0.01$ ).
